# Supplementary material for: Development and Validation of a Nomogram for Predicting the Risk of Adverse Cardiovascular Events in Patients with Coronary Artery Ectasia
Source: MDPI journal article supplement (doi:10.3390/jcdd8120186), 2021-12-14

## **SUPPLEMENTARY MATERIAL**

**Table S1. Coronary artery reference diameter in 231 age-sex-matched angiographically normal subjects.**

**Table S2. Collected clinical variables.**

**Table S3. Correlation coefficient matrix of the candidate variables.**

**Figure S1. Reported CAE in Fuwai hospital during 2009 to 2015.**

**Figure S2. Schoenfeld residual test of the prediction model.**

**Figure S3. Restricted cubic splines suggested hsCRP>3mg/L as an inflection point for hazard ratio.**

**Table S1. Coronary artery reference diameter in 231 age-sex-matched angiographically normal subjects.**

| Coronary artery segment         | reference diameter (mm) |
|---------------------------------|-------------------------|
| Right coronary artery           |                         |
| Proximal                        | 3.7±0.6                 |
| Middle                          | 3.1±0.5                 |
| Distal                          | 2.8±0.5                 |
| Posterior descending            | 1.7±0.4                 |
| Posterolateral branch           | 1.9±0.4                 |
| Left anterior descending artery |                         |
| Proximal                        | 3.2±0.6                 |
| Middle                          | 2.8±0.5                 |
| Distal                          | 2.0±0.4                 |
| Left circumflex artery          |                         |
| Proximal                        | 3.1±0.6                 |
| Distal                          | 2.4±0.4                 |
| Obtuse marginal                 | 1.9±0.5                 |
| Left main                       | 4.4±0.6                 |

Values are mean ± SD.

**Table S2. Collected clinical variables.**

|                                                               |                                                                                                                                                                                  |
|---------------------------------------------------------------|----------------------------------------------------------------------------------------------------------------------------------------------------------------------------------|
| Demographic data and medical history                          | Age, gender, BMI, Clinical presentation, prior MI, prior PCI, hypertension, diabetes, dyslipidemia, peripheral artery disease, family history of coronary heart disease, smoking |
| Laboratory test (at baseline and before coronary angiography) | white blood cell count, hemoglobin concentration, platelet count, serum creatinine, TC, TG, HDL-C, LDL-C, HbA1c, hsCRP, ESR, D-dimer, NT-proBNP.                                 |
| Echocardiography                                              | LVEF, LVID.                                                                                                                                                                      |

**Table S3. Correlation coefficient matrix of the candidate variables**

| Variables           | age    | prior PCI | LVEF   | LVID   | hsCRP<br>>3mg/L | NT-proBNP | MAXD≥5mm | MAXL<br>ratio≥1/3 | D-dimer><br>0.5mg/L |
|---------------------|--------|-----------|--------|--------|-----------------|-----------|----------|-------------------|---------------------|
| age                 | 1.000  | -0.010    | 0.047  | -0.179 | -0.038          | 0.079     | -0.121   | -0.100            | 0.178               |
| prior PCI           | -0.010 | 1.000     | -0.099 | 0.057  | -0.078          | -0.115    | -0.028   | -0.022            | 0.025               |
| LVEF                | 0.047  | -0.099    | 1.000  | -0.426 | -0.068          | -0.241    | -0.108   | -0.079            | -0.077              |
| LVID                | -0.179 | 0.057     | -0.426 | 1.000  | 0.076           | 0.161     | 0.181    | 0.156             | 0.014               |
| hsCRP<br>>3mg/L     | -0.038 | -0.078    | -0.068 | 0.076  | 1.000           | 0.167     | 0.032    | 0.019             | 0.092               |
| NT-proBNP           | 0.079  | -0.115    | -0.241 | 0.161  | 0.167           | 1.000     | 0.034    | 0.046             | 0.084               |
| MAXD≥5mm            | -0.121 | -0.028    | -0.108 | 0.181  | 0.032           | 0.034     | 1.000    | 0.360             | -0.023              |
| MAXL<br>ratio≥1/3   | -0.100 | -0.022    | -0.079 | 0.156  | 0.019           | 0.046     | 0.360    | 1.000             | 0.042               |
| D-dimer><br>0.5mg/L | 0.178  | 0.025     | -0.077 | 0.014  | 0.092           | 0.084     | -0.023   | 0.042             | 1.000               |

**Figure S1. Reported CAE in Fuwai hospital during 2009 to 2015.**

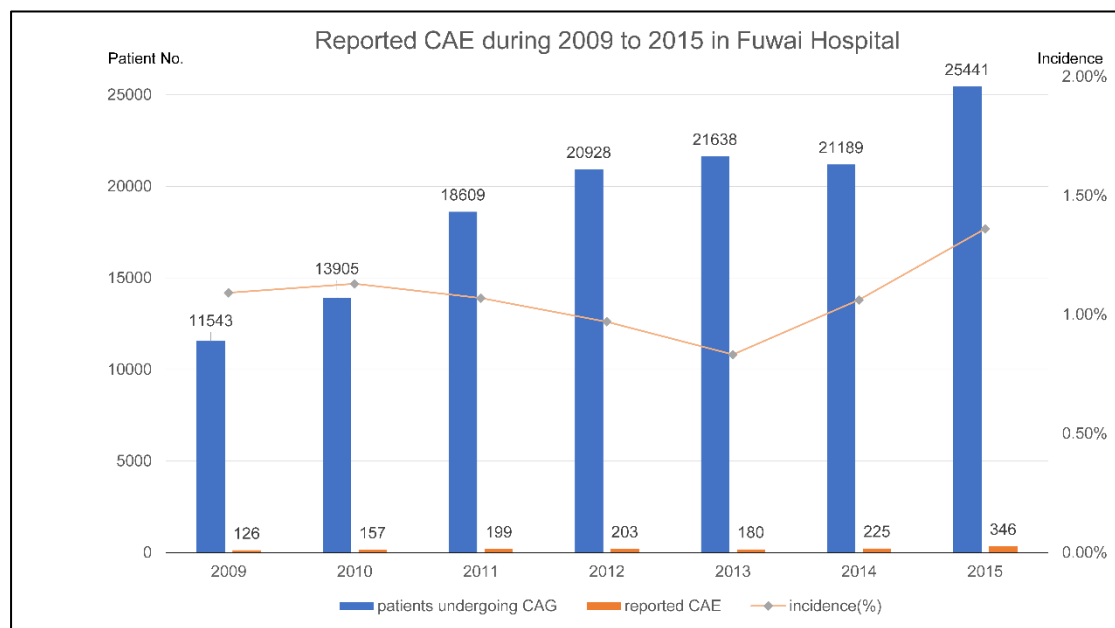

Figure S2. Schoenfeld residual test of the prediction model.

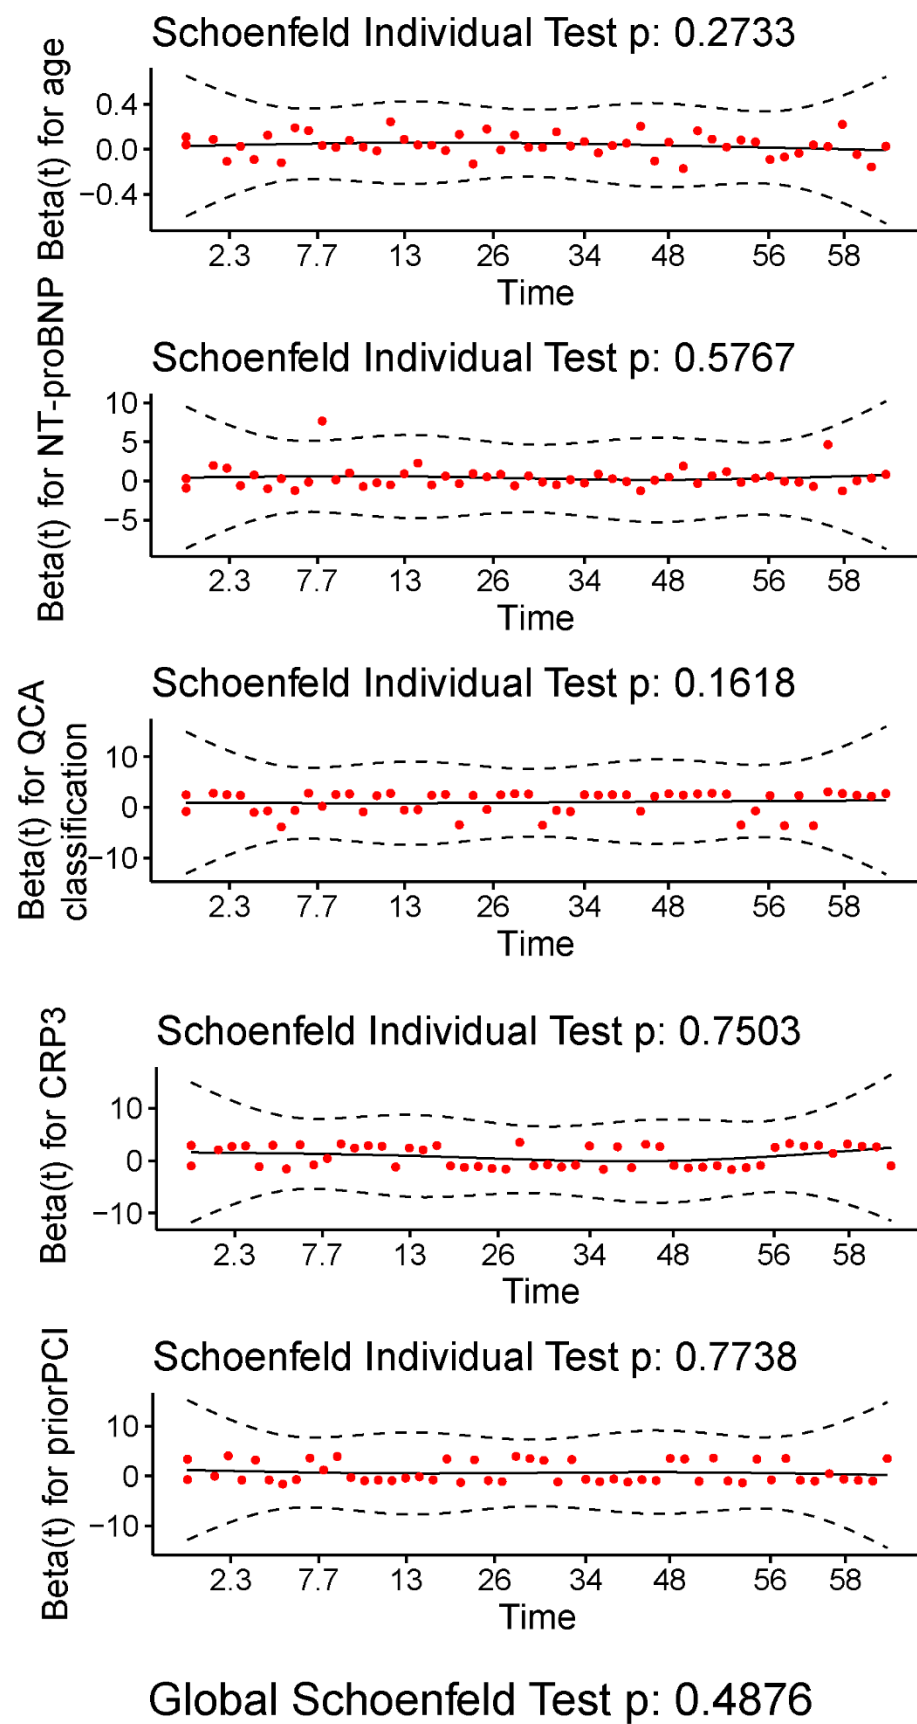

**Figure S3. Restricted cubic splines suggested hsCRP>3mg/L as an inflection point for hazard ratio.**

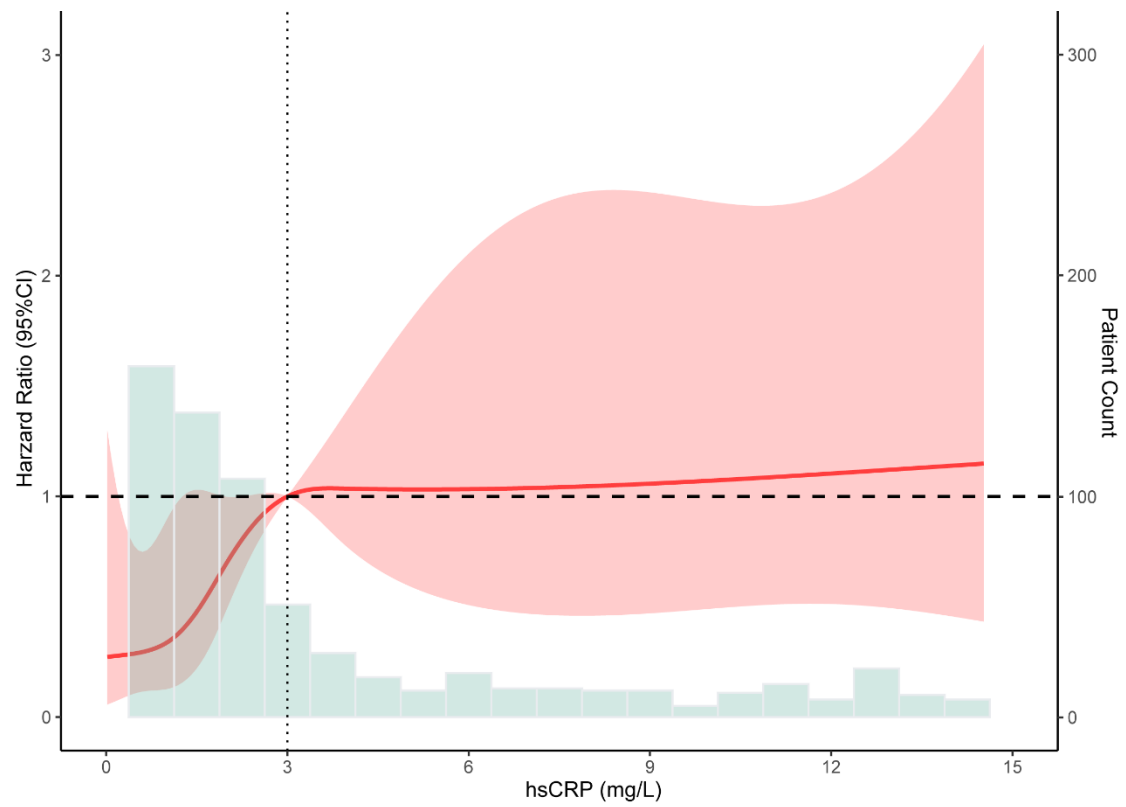

Supplement: s1 [file s1]
